# Supplementary material
Source: PubMed Central journal article supplement (PMC3589164)
Supplement: mt2012279x1.pdf [file mt2012279x1.pdf]

# Supplementary Figure S1.

**A.**

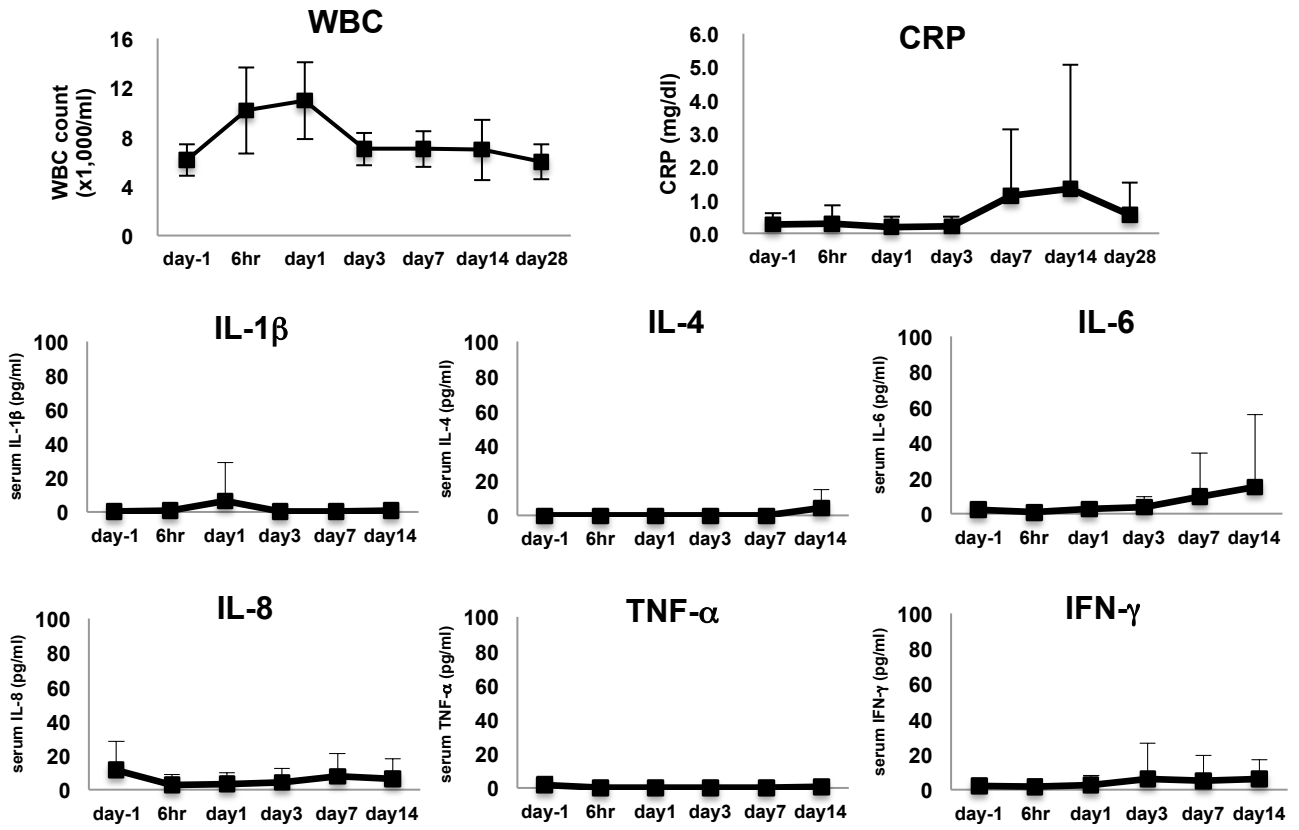

**B.**

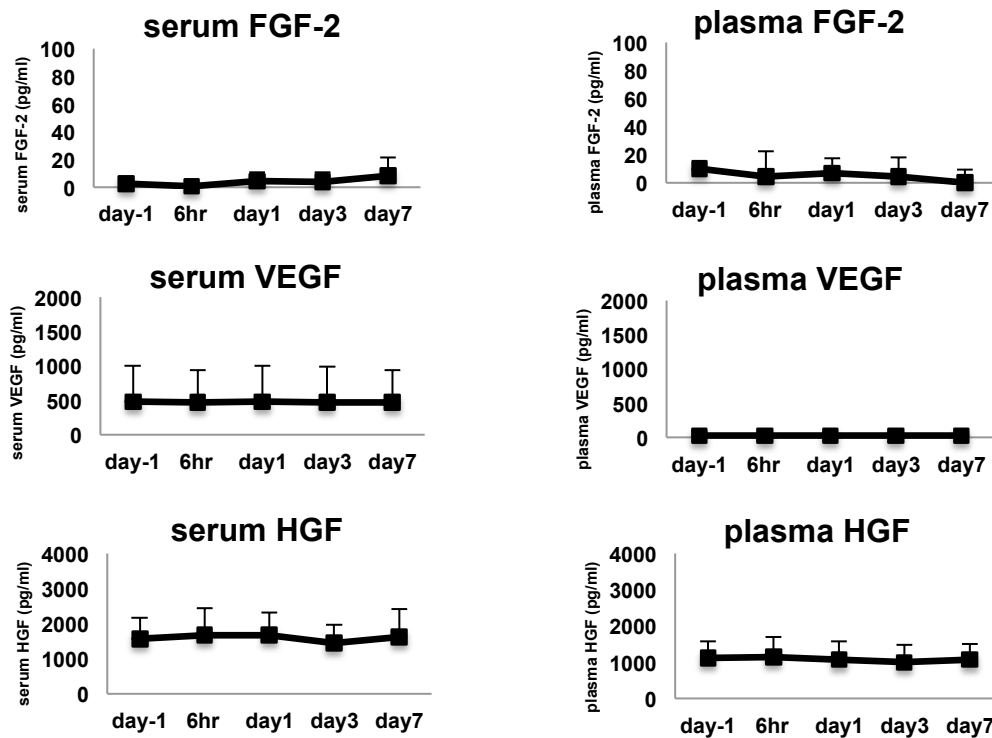

# Supplementary Figure S2.

**A.**

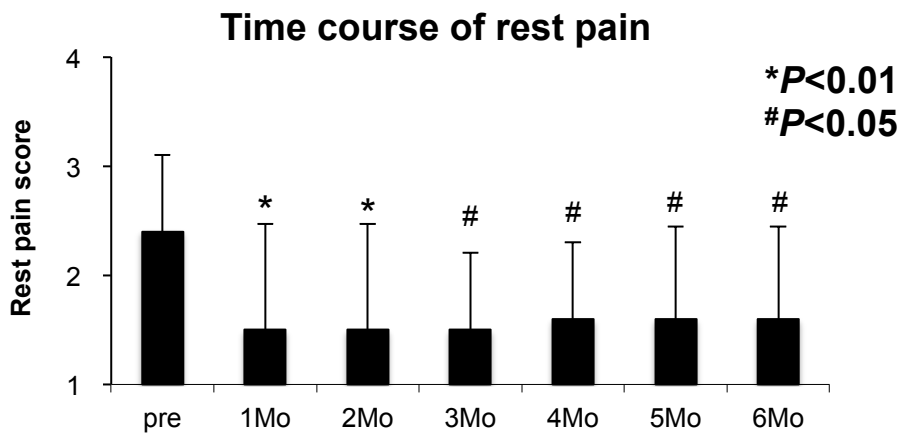

**B.**

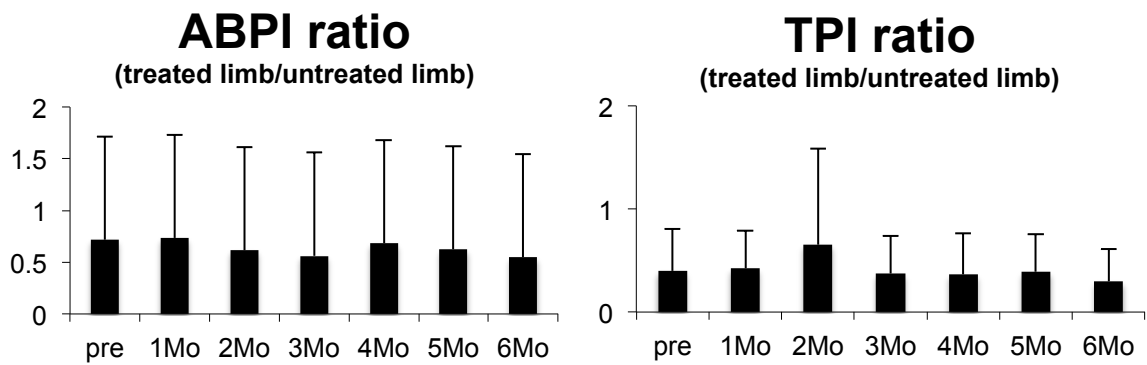

**C.**

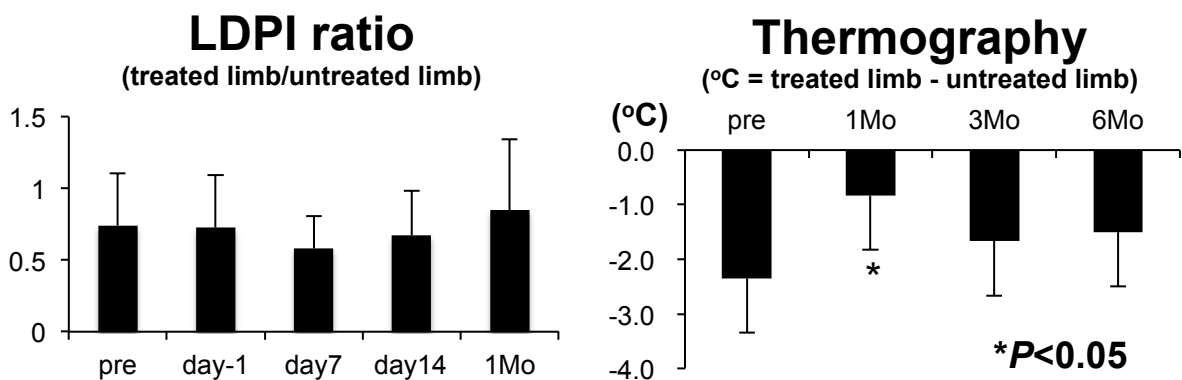

# Supplementary Figure S3.

## A. ACD (m)

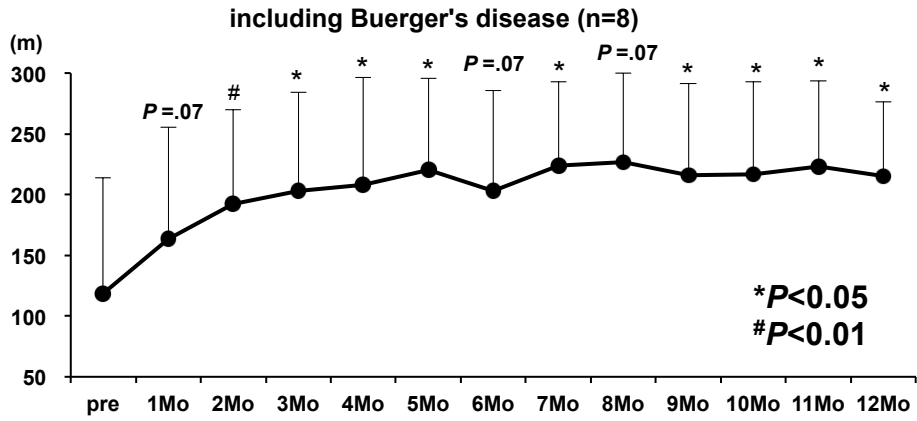

## B. $\Delta$ ACD (%)

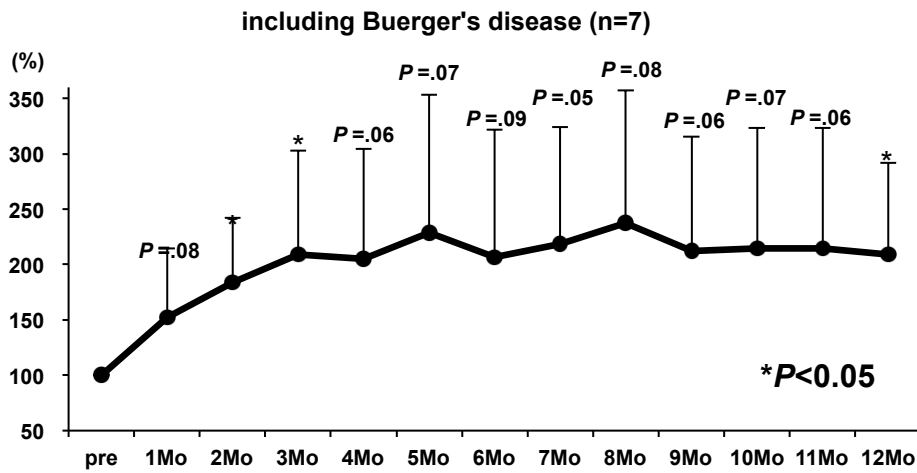

## Legends for Supplementary Figures.

### Supplementary Figure S1.

A. Time courses of inflammation/immune response-related parameters, including white blood cell count (WBC), serum C-reactive protein (CRP) level, serum interleukin-1 $\beta$  (IL-1 $\beta$ ), serum IL-4, serum IL-6, serum IL-8, serum tumor necrosis factor- $\alpha$  (TNF- $\alpha$ ), and interferon- $\gamma$  (IFN- $\gamma$ ). Blood samples were collected at each time point, and subjected to laboratory examination. Each proinflammatory cytokine level was determined by specific ELISA as manufactures' instructions.

B. Time courses of circulating angiogenic factors, including serum and plasma FGF-2, VEGF, and HGF. Blood samples were collected at each time point, and subjected to the specific ELISA as manufactures' instructions.

### Supplementary Figure S2.

Time courses of rest pain score (a), ankle-brachial pressure index (ABPI) and toe pressure index (TPI) (b), laser Doppler perfusion index (LDPI) ratio, and thermography (c), related to efficacy. \* $p < 0.01$ , # $p < 0.05$ .

### Supplementary Figure S3.

Time course of A: absolute claudication distance (ACD; m, n = 8) and B: Change of ACD ( $\Delta$ ACD: %, n = 7). \* $p < 0.05$ .

The data of the two patients with Buerger's disease were included.

## Supplementary Table S1. Patients Cohort

| cohort<br>(dose/60kg)             | case<br>No. | treatment                |                                 |                |      |          |
|-----------------------------------|-------------|--------------------------|---------------------------------|----------------|------|----------|
|                                   |             | total dose<br>(ciu/head) | injection sites (30 injections) |                |      |          |
|                                   |             |                          | Upper<br>thigh                  | Lower<br>thigh | Calf | Foot pad |
| Stage 1<br>( $5 \times 10^7$ ciu) | 102         | $5.21 \times 10^7$       | 10                              | 10             | 10   | 0        |
|                                   | 103         | $5.25 \times 10^7$       | 7                               | 8              | 10   | 5        |
|                                   | 105         | $3.98 \times 10^7$       | 0                               | 12             | 18   | 0        |
| Stage 2<br>( $2 \times 10^8$ ciu) | 201         | $1.63 \times 10^8$       | 10                              | 10             | 10   | 0        |
|                                   | 203         | $2.11 \times 10^8$       | 10                              | 10             | 10   | 0        |
|                                   | 204         | $1.79 \times 10^8$       | 10                              | 10             | 10   | 0        |
| Stage 3<br>( $1 \times 10^9$ ciu) | 303         | $0.87 \times 10^9$       | 0                               | 9              | 21   | 0        |
|                                   | 304         | $1.20 \times 10^9$       | 0                               | 14             | 16   | 0        |
|                                   | 305         | $1.07 \times 10^9$       | 6                               | 9              | 15   | 0        |
| Stage 4<br>( $5 \times 10^9$ ciu) | 401         | $7.70 \times 10^9$       | 0                               | 0              | 30   | 0        |
|                                   | 403         | $6.35 \times 10^9$       | 0                               | 6              | 20   | 4        |
|                                   | 405         | $4.98 \times 10^9$       | 0                               | 14             | 16   | 0        |

## Supplementary Table S2. Virus Shedding

### Genome copies (gc/μl): urine

| Case No. | pre  | D0 (6 hrs) | D1   | D3   | D7   | D8 - 15 |
|----------|------|------------|------|------|------|---------|
| 102      | <0.1 | <0.1       | <0.1 | <0.1 | <0.1 | <0.1    |
| 103      | <0.1 | <0.1       | <0.1 | <0.1 | <0.1 | <0.1    |
| 105      | <0.1 | <0.1       | <0.1 | <0.1 | <0.1 | <0.1    |
| 201      | <0.1 | <0.1       | <0.1 | <0.1 | <0.1 | <0.1    |
| 203      | <0.1 | <0.1       | <0.1 | <0.1 | <0.1 | <0.1    |
| 204      | <0.1 | <0.1       | <0.1 | <0.1 | <0.1 | <0.1    |
| 303      | <0.1 | <0.1       | <0.1 | <0.1 | <0.1 | <0.1    |
| 304      | <0.1 | <0.1       | <0.1 | <0.1 | <0.1 | <0.1    |
| 305      | <0.1 | <0.1       | <0.1 | <0.1 | <0.1 | <0.1    |
| 401      | <0.1 | <0.1       | <0.1 | <0.1 | <0.1 | <0.1    |
| 403      | <0.1 | <0.1       | <0.1 | <0.1 | <0.1 | <0.1    |
| 405      | <0.1 | <0.1       | <0.1 | <0.1 | <0.1 | <0.1    |

### Genome copies (gc/μl): whole blood

| Case No. | pre  | D0 (6 hrs) | D1   | D3   | D7   | D8 - 15 |
|----------|------|------------|------|------|------|---------|
| 102      | <0.1 | <0.1       | <0.1 | <0.1 | <0.1 | <0.1    |
| 103      | <0.1 | <0.1       | <0.1 | <0.1 | <0.1 | <0.1    |
| 105      | <0.1 | <0.1       | <0.1 | <0.1 | <0.1 | <0.1    |
| 201      | <0.1 | <0.1       | <0.1 | <0.1 | <0.1 | <0.1    |
| 203      | <0.1 | <0.1       | <0.1 | <0.1 | <0.1 | <0.1    |
| 204      | <0.1 | <0.1       | <0.1 | <0.1 | <0.1 | <0.1    |
| 303      | <0.1 | ≥0.1       | ≥0.1 | <0.1 | <0.1 | <0.1    |
| 304      | <0.1 | <0.1       | <0.1 | <0.1 | <0.1 | <0.1    |
| 305      | <0.1 | <0.1       | <0.1 | <0.1 | <0.1 | <0.1    |
| 401      | <0.1 | ≥0.1       | ≥0.1 | <0.1 | <0.1 | <0.1    |
| 403      | <0.1 | <0.1       | <0.1 | <0.1 | <0.1 | <0.1    |
| 405      | <0.1 | ≥0.1       | ≥0.1 | ≥0.1 | ≥0.1 | <0.1    |

### Hemagglutinating activity: urine

| Case No. | pre | D0 (6 hrs) | D1  | D3  | D7  | D8 - 15 |
|----------|-----|------------|-----|-----|-----|---------|
| 102      | (-) | (-)        | (-) | (-) | (-) | (-)     |
| 103      | (-) | (-)        | (-) | (-) | (-) | (-)     |
| 105      | (-) | (-)        | (-) | (-) | (-) | (-)     |
| 201      | (-) | (-)        | (-) | (-) | (-) | (-)     |
| 203      | (-) | (-)        | (-) | (-) | (-) | (-)     |
| 204      | (-) | (-)        | (-) | (-) | (-) | (-)     |
| 303      | (-) | (-)        | (-) | (-) | (-) | (-)     |
| 304      | (-) | (-)        | (-) | (-) | (-) | (-)     |
| 305      | (-) | (-)        | (-) | (-) | (-) | (-)     |
| 401      | (-) | (-)        | (-) | (-) | (-) | (-)     |
| 403      | (-) | (-)        | (-) | (-) | (-) | (-)     |
| 405      | (-) | (-)        | (-) | (-) | (-) | (-)     |

### Hemagglutinating activity: whole blood

| Case No. | pre | D0 (6 hrs) | D1  | D3  | D7  | D8 - 15 |
|----------|-----|------------|-----|-----|-----|---------|
| 102      | (-) | (-)        | (-) | (-) | (-) | (-)     |
| 103      | (-) | (-)        | (-) | (-) | (-) | (-)     |
| 105      | (-) | (-)        | (-) | (-) | (-) | (-)     |
| 201      | (-) | (-)        | (-) | (-) | (-) | (-)     |
| 203      | (-) | (-)        | (-) | (-) | (-) | (-)     |
| 204      | (-) | (-)        | (-) | (-) | (-) | (-)     |
| 303      | (-) | (-)        | (-) | (-) | (-) | (-)     |
| 304      | (-) | (-)        | (-) | (-) | (-) | (-)     |
| 305      | (-) | (-)        | (-) | (-) | (-) | (-)     |
| 401      | (-) | (-)        | (-) | (-) | (-) | (-)     |
| 403      | (-) | (-)        | (-) | (-) | (-) | (-)     |
| 405      | (-) | (-)        | (-) | (-) | (-) | (-)     |

## Supplementary Table S3. Pulse-volume Recording

| Case No. | limb          |   | pre | 1Mo                                   | 2Mo                                   | 3Mo | 4Mo | 5Mo | 6Mo |
|----------|---------------|---|-----|---------------------------------------|---------------------------------------|-----|-----|-----|-----|
| 102      | treated       | R | (-) | (-)                                   | (-)                                   | (-) | (-) | (-) | (-) |
|          | contralateral | L | ++  | ++                                    | ++                                    | ++  | ++  | ++  | ++  |
| 103      | treated       | L | (-) | Not available due to major amputation |                                       |     |     |     |     |
|          | contralateral | R | ++  |                                       |                                       |     |     |     |     |
| 105      | treated       | L | (-) | (-)                                   | Not available due to minor amputation |     |     |     |     |
|          | contralateral | R | ++  | ++                                    |                                       |     |     |     |     |
| 201      | treated       | R | (-) | (-)                                   | +                                     | (-) | (-) | +   | (-) |
|          | contralateral | L | (-) | (-)                                   | (-)                                   | (-) | (-) | (-) | (-) |
| 203      | treated       | L | ++  | ++                                    | ++                                    | +   | +   | +   | ++  |
|          | contralateral | R | ++  | ++                                    | ++                                    | +   | +   | +   | ++  |
| 204      | treated       | R | (-) | ++                                    | (-)                                   | +   | +   | +   | +   |
|          | contralateral | L | ++  | ++                                    | ++                                    | ++  | ++  | ++  | ++  |
| 303      | treated       | R | +   | +                                     | *1                                    | +   | +   | (-) | +   |
|          | contralateral | L | +   | ++                                    | +                                     | +   | +   | +   | +   |
| 304      | treated       | R | (-) | +                                     | +                                     | +   | (-) | (-) | (-) |
|          | contralateral | L | ++  | ++                                    | ++                                    | ++  | ++  | ++  | ++  |
| 305      | treated       | L | (-) | (-)                                   | (-)                                   | (-) | (-) | (-) | +   |
|          | contralateral | R | +   | ++                                    | ++                                    | ++  | ++  | ++  | ++  |
| 401      | treated       | R | +   | (-)                                   | (-)                                   | (-) | (-) | +   | +   |
|          | contralateral | L | ++  | ++                                    | ++                                    | ++  | ++  | ++  | ++  |
| 403      | treated       | R | (-) | +                                     | +                                     | (-) | +   | +   | (-) |
|          | contralateral | L | ++  | ++                                    | ++                                    | ++  | ++  | ++  | ++  |
| 405      | treated       | R | (-) | +                                     | +                                     | +   | +   | ++  | +   |
|          | contralateral | L | ++  | ++                                    | ++                                    | ++  | ++  | ++  | ++  |

\*1: not available
